# Supplementary material for: The use of zinc oxide nanoparticles to enhance the antibacterial properties of light-activated polydimethylsiloxane containing crystal violet
Source: Royal Society of Chemistry journal article supplement (doi:10.1039/c4ra13649g), 2014-12-23
Supplement: c4ra13649g1.pdf [file c4ra13649g1.pdf]

Supplementary information:

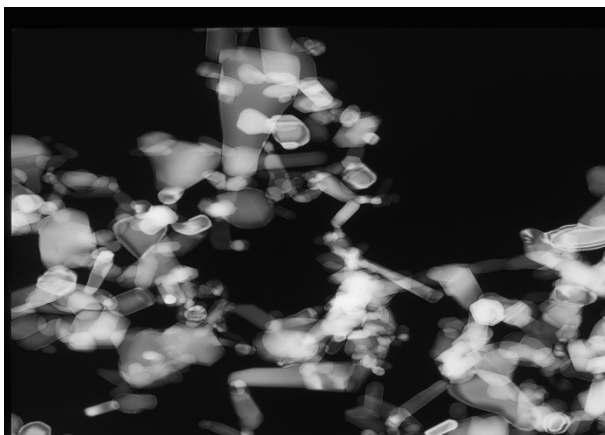

**Fig. S1** TEM image of commercial ZnO nanoparticles

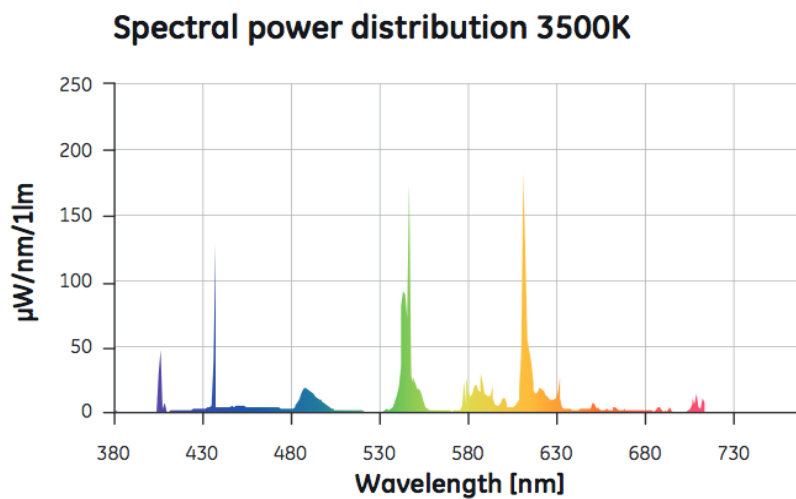

**Fig. S2** Spectral emission profile for the white light source used in the experiments. Clearly, there is no emission below 410 nm wavelength.

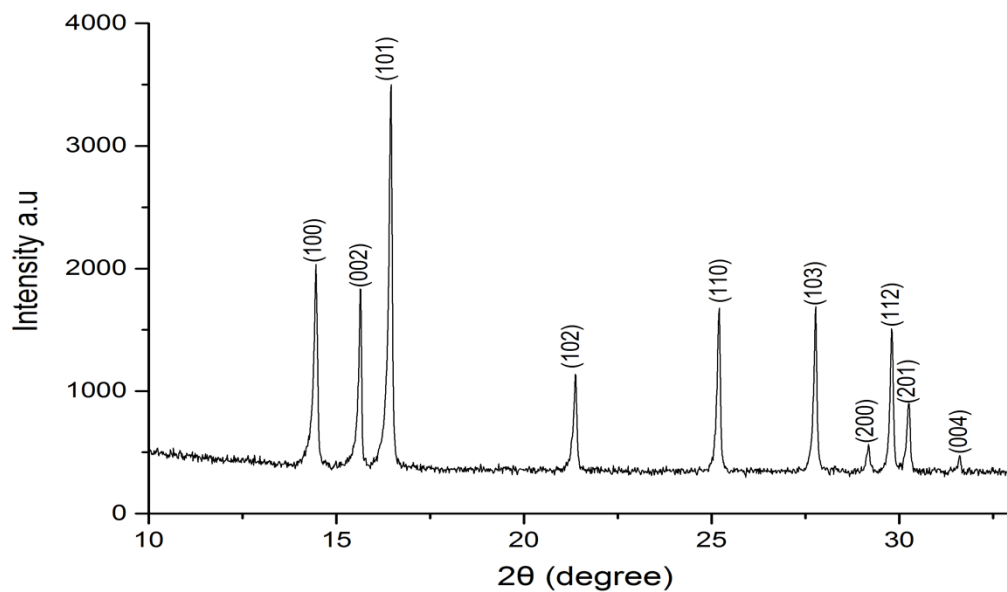

**Fig. S3** The X-ray diffraction spectrum of the ZnO nanopowder. The peaks were indexed to polycrystalline wurtzite structure.
